# Supplementary material for: Resettable skin interfaced microfluidic sweat collection devices with chemesthetic hydration feedback
Source: PubMed Central journal article supplement (PMC6892844; doi:10.1038/s41467-019-13431-8), 2019-12-04
Supplement: 41467_2019_13431_MOESM1_ESM.pdf [file 41467_2019_13431_MOESM1_ESM.pdf]

# Supplementary Information

## Resettable Skin Interfaced Microfluidic Sweat Collection Devices with Chemesthetic Hydration Feedback

*Jonathan T. Reeder<sup>1,2</sup>, Yeguang Xue<sup>3,4</sup>, Daniel Franklin<sup>2</sup>, Yujun Deng<sup>3,4,5</sup>, Jungil Choi<sup>1,2,6</sup>, Olivia Prado<sup>7</sup>, Robin Kim<sup>7</sup>, Claire Liu<sup>7</sup>, Justin Hanson<sup>8</sup>, John Ciraldo<sup>9</sup>, Amay J. Bandonkar<sup>1,2</sup>, Siddharth Krishnan<sup>10</sup>, Alexandra Johnson<sup>6</sup>, Emily Patnaude<sup>6</sup>, Raudel Avila<sup>3,4</sup>, Yonggang Huang<sup>1,3,4</sup>, John A. Rogers<sup>1,2,4,5,11,12\*</sup>*

<sup>1</sup>Department of Materials Science and Engineering, McCormick School of Engineering, Northwestern University, Evanston, IL 60208, USA

<sup>2</sup>Center for Bio-Integrated Electronics, Northwestern University, Evanston, IL 60208, USA

<sup>3</sup>Department of Civil and Environmental Engineering, McCormick School of Engineering, Northwestern University, Evanston, IL 60208, USA

<sup>4</sup>Department of Mechanical Engineering, McCormick School of Engineering, Northwestern University, Evanston, IL 60208, USA

<sup>5</sup>State Key Laboratory of Mechanical System and Vibration, Shanghai Jiao Tong University, Shanghai, 200240, China

<sup>6</sup>School of Mechanical Engineering, Kookmin University, Seoul 02707, Republic of Korea

<sup>7</sup>Department of Biomedical Engineering, McCormick School of Engineering, Northwestern University, Evanston, IL 60208, USA

<sup>8</sup>Department of Biology, Feinberg School of Medicine, Northwestern University, Chicago IL 60611 USA

<sup>9</sup>Micro/Nano Fabrication Facility, Northwestern University, Evanston, IL 60208, USA

<sup>10</sup>Department of Materials Science and Engineering and Frederick Seitz Materials Research Laboratory, University of Illinois at Urbana-Champaign, Urbana, IL 61801, USA

<sup>11</sup>Departments of Chemistry, Electrical Engineering, Computer Science, McCormick School of Engineering, Northwestern University, Evanston, IL 60208, USA

<sup>12</sup>Departments of Neurological Surgery, Feinberg School of Medicine, Northwestern University, Chicago IL 60611 USA

Corresponding author: [jrogers@northwestern.edu](mailto:jrogers@northwestern.edu)

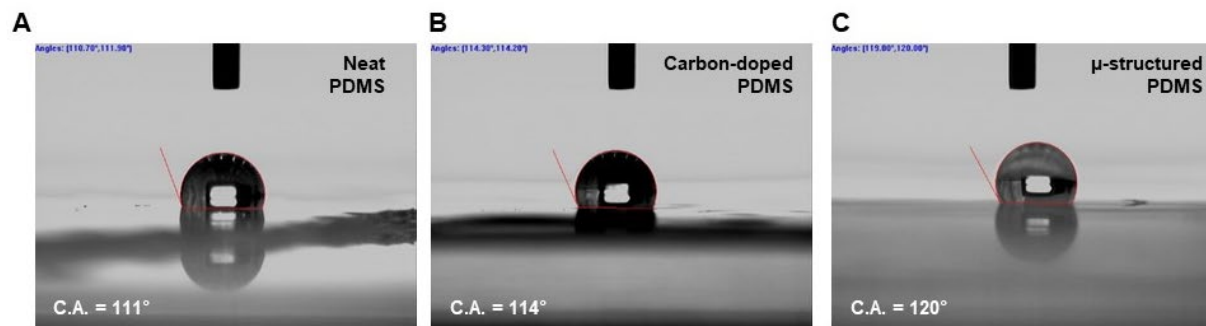

**Supplementary Figure 1. Contact angle of PDMS surfaces.** A) Neat PDMS. B) PDMS doped with carbon black. C) Microstructured PDMS.

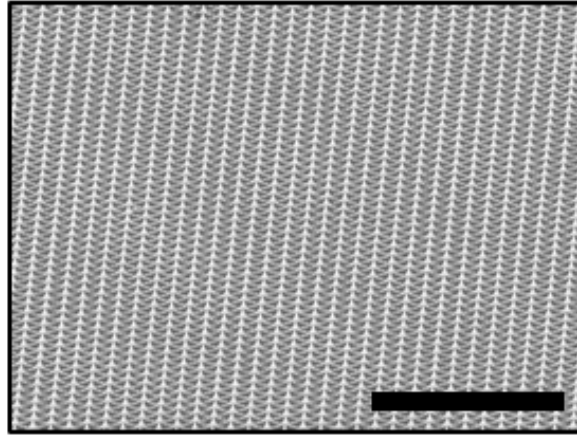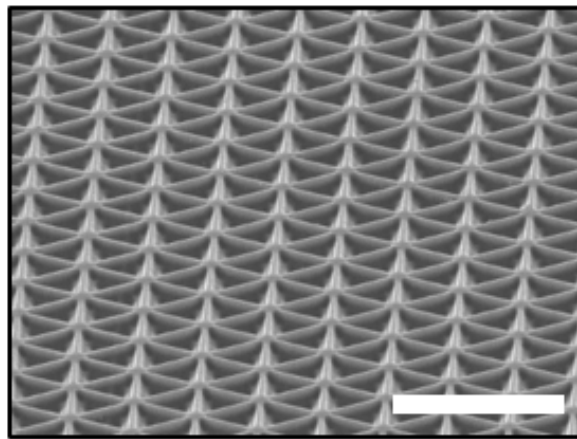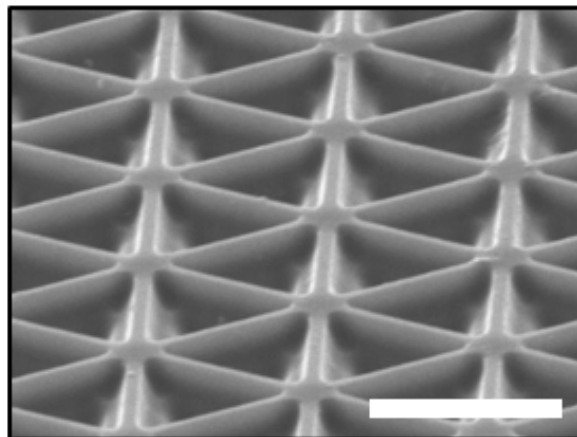

**Supplementary Figure 2. Fluid indicator molds.** Scanning electron microscopy of epoxy molds fabricated from a master photoresist mold formed via grayscale lithography. Scale bars: 200, 50, 20  $\mu\text{m}$  (top to bottom)

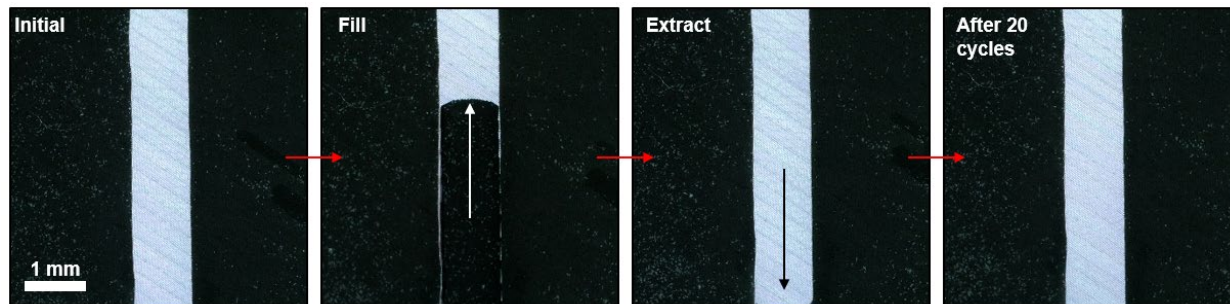

**Supplementary Figure 3. Microstructural optics repeatability.** Effect of cyclic filling and extraction of 50 mM NaCl. Scale bar: 1 mm.

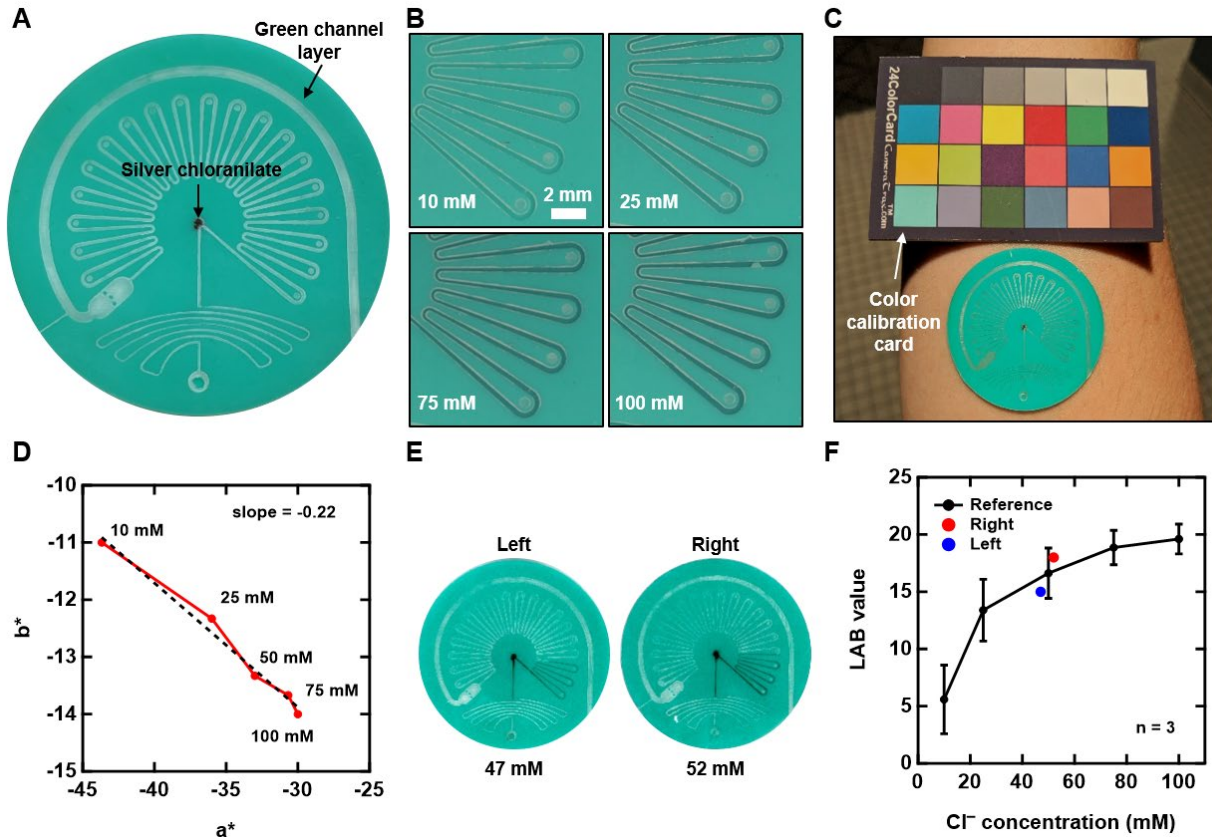

**Supplementary Figure 4. Chloride measurements.** A) A green molded layer provides a background for viewing both extent of fluid ingress via the microstructural optics as well as for colorimetric detection of sweat chloride via a reaction with silver chloranilate. Scale bar: 1 cm. B) Images of devices filled with reference chloride concentrations for calibration. C) A 24-panel color card is placed next to the device to enable color calibration in post-processing. D)  $a^*$  and  $b^*$  values for reference chloride measurements (LAB color space). Scale bar: 1 cm. D) Representative images of an on body chloride trial from the left and right volar forearms of a subject. F) Colorimetric detection of chloride sweat levels closely match those provided by a chloridometer. The LAB value represents the scaler projection of the measured color value onto the calibration curve in  $a^* b^*$  space as shown in panel D. The error bars indicate standard deviation.

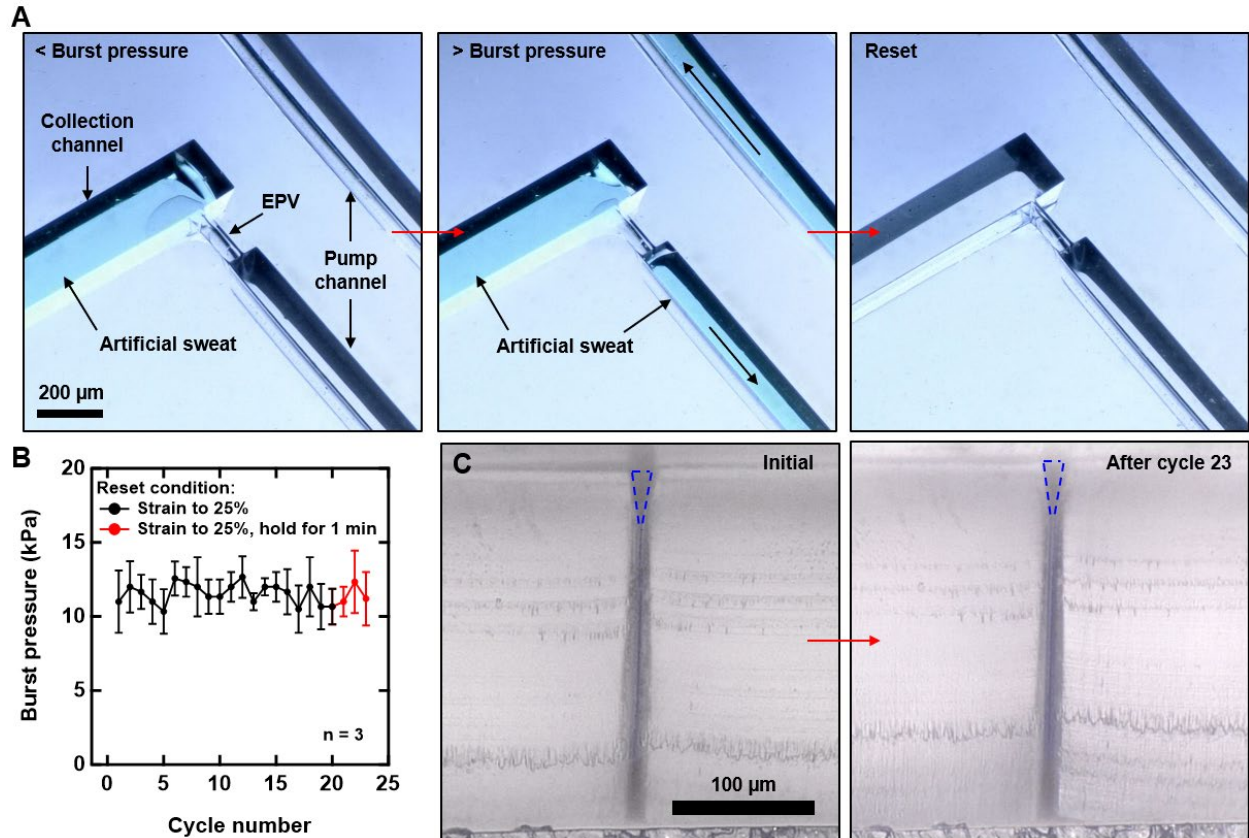

**Supplementary Figure 5. Elastomeric pinch valve repeatability.** A) Micrographs of an elastomeric pinch valve undergoing a burst pressure test. Before bursting (left), after bursting (center), and after resetting (right). No residual water droplets are observable due to the hydrophobicity of the PDMS. Scale car: 200  $\mu\text{m}$ . B) No significant changes in burst pressure are observed for 20 cycles, or after an additional three cycles of 1 min hold. C) No significant changes in valve morphology are observed after cyclic burst pressure testing. Scale bar: 100  $\mu\text{m}$ .

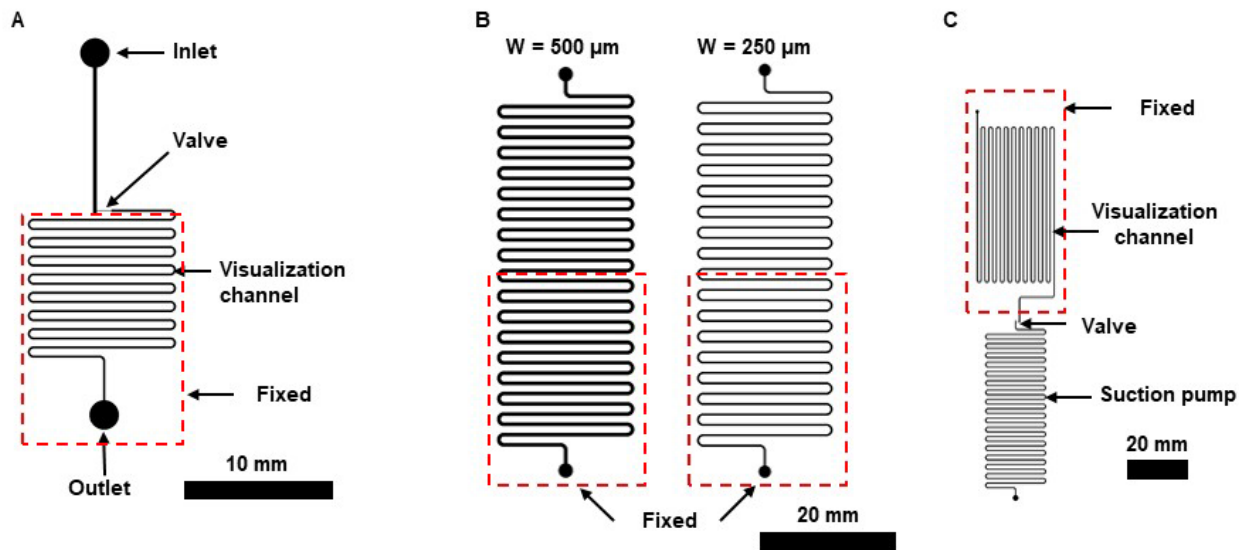

**Supplementary Figure 6. Structure geometries for systematic tests of the microfluidic components and systems.** A) Valve burst pressure tests. Scale bar: 10 mm. B) Pump tests. Scale bar: 20 mm. C) Purge tests. Scale bar: 20 mm.

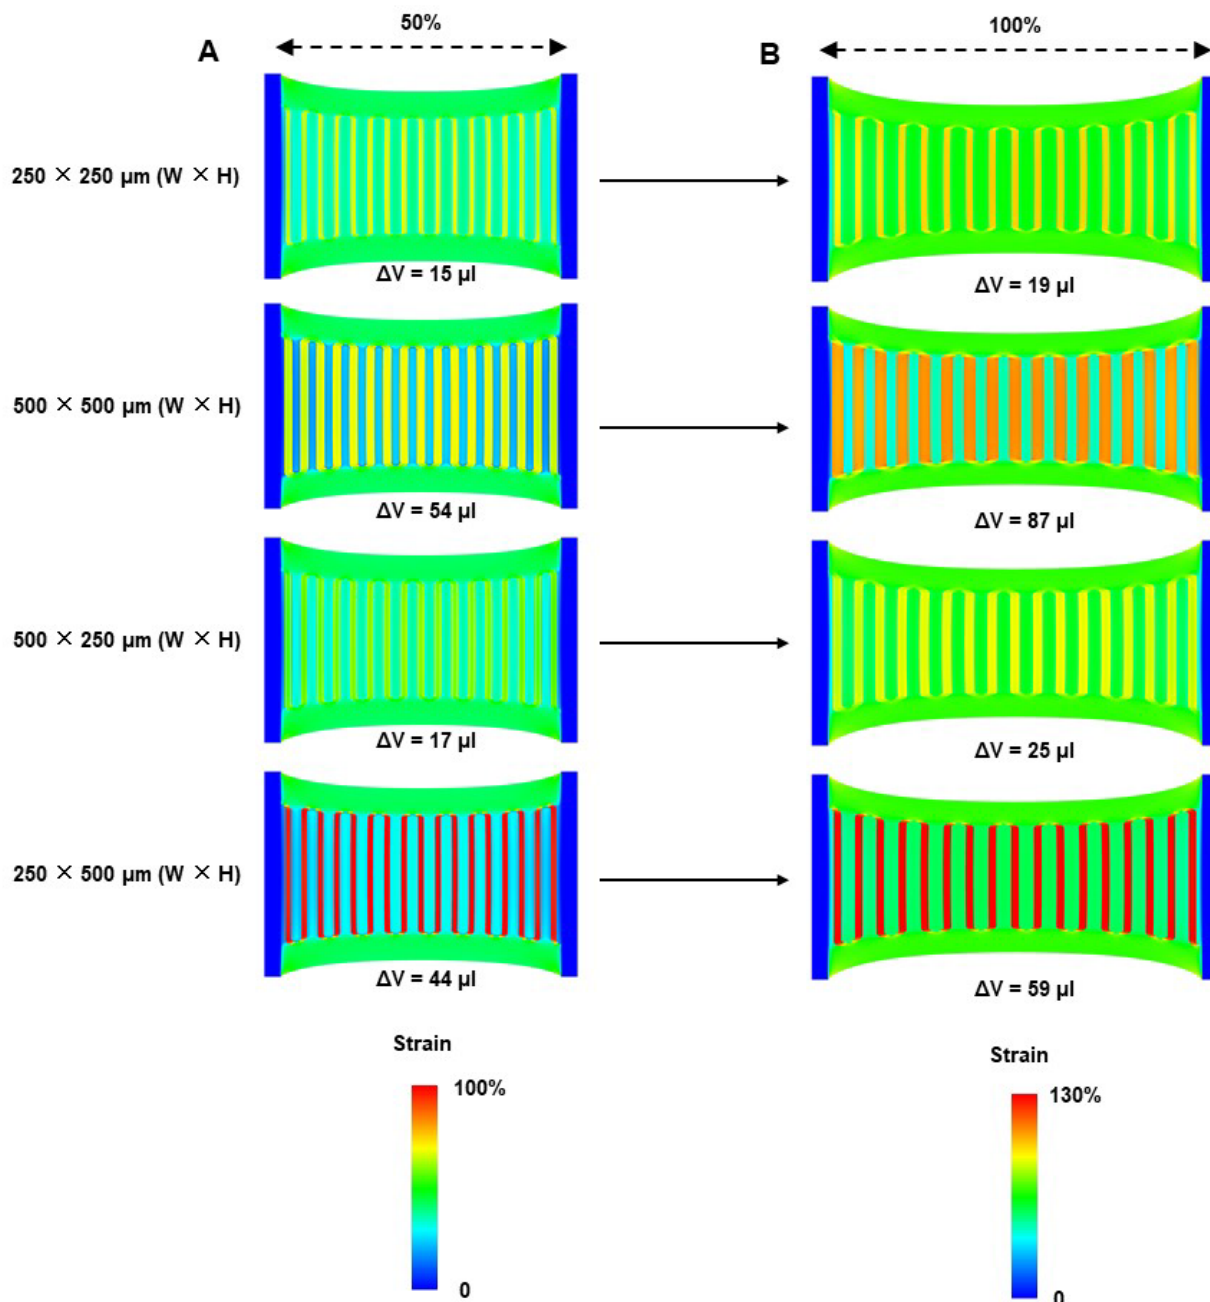

**Supplementary Figure 7. 3D FEA of suction pump test structures. A) 50% strain. B) 100% strain.  $\Delta V$  = volume change.**



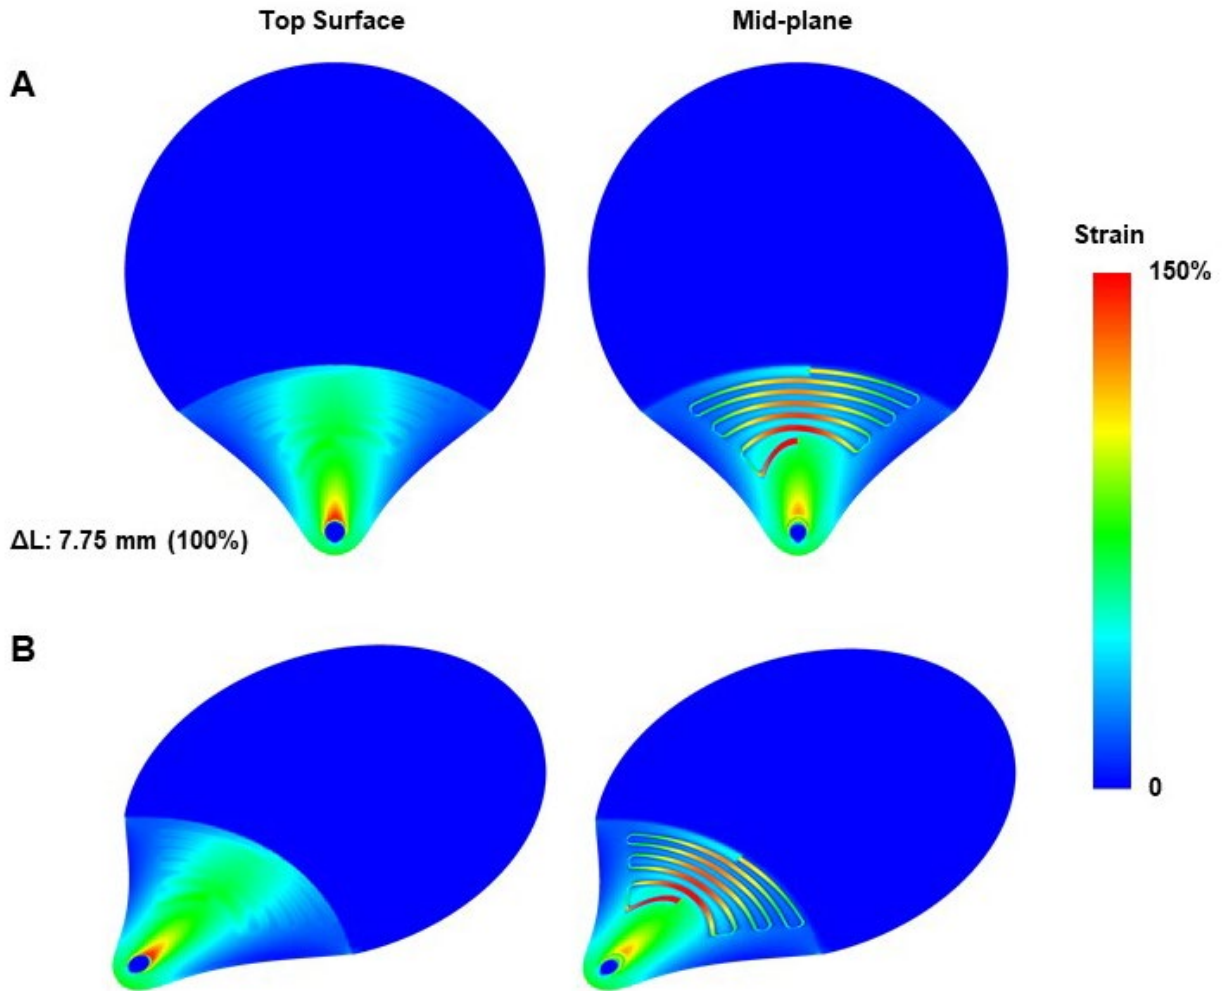

**Supplementary Figure 8. 3D FEA of curved suction pump.** A) Top view. B) Oblique view.  $\Delta L$  = displacement.

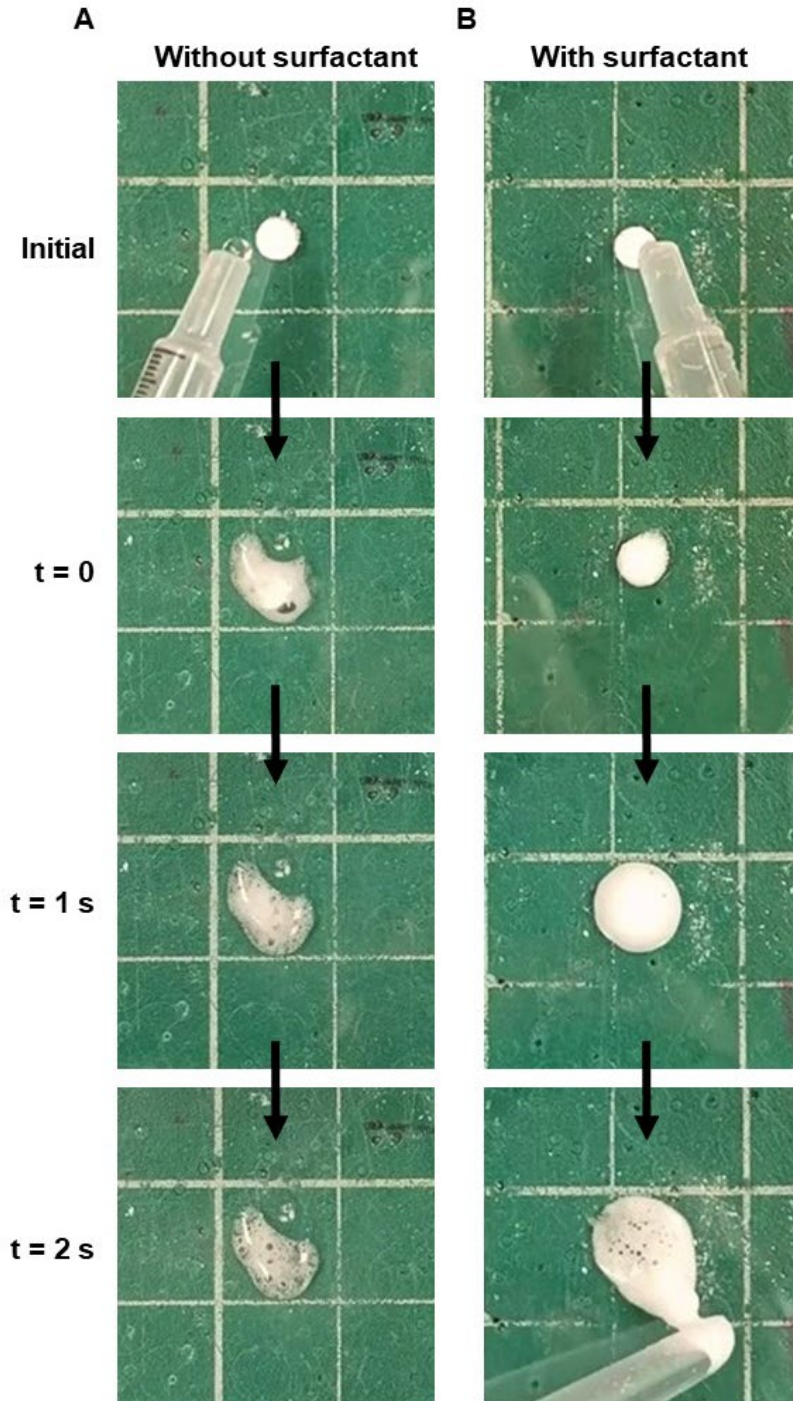

**Supplementary Figure 9. Effect of surfactant on foaming behavior of the effervescent tablet.** A) Images of a 1 mg tablet of sodium bicarbonate: citric acid (1.2:1 wt:wt) reacting with a droplet of water. B) Images of a 1 mg tablet of sodium bicarbonate: citric acid (1.2:1 wt:wt) with an additional 3wt% polysorbate 20 reacting with a droplet of water. Scale bar: 5 mm.

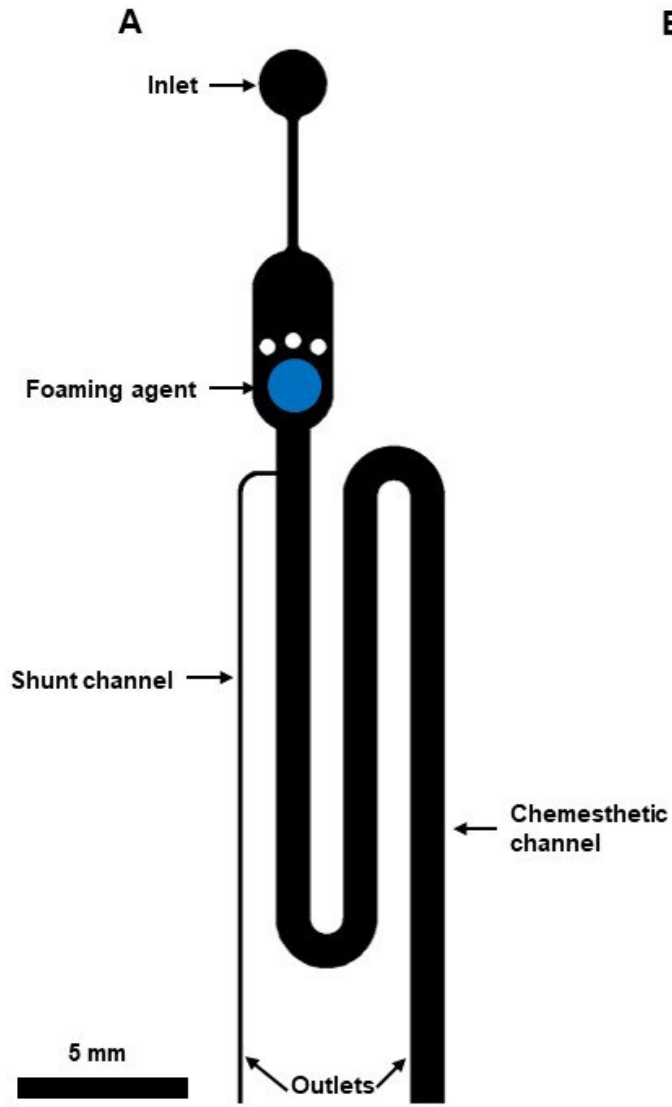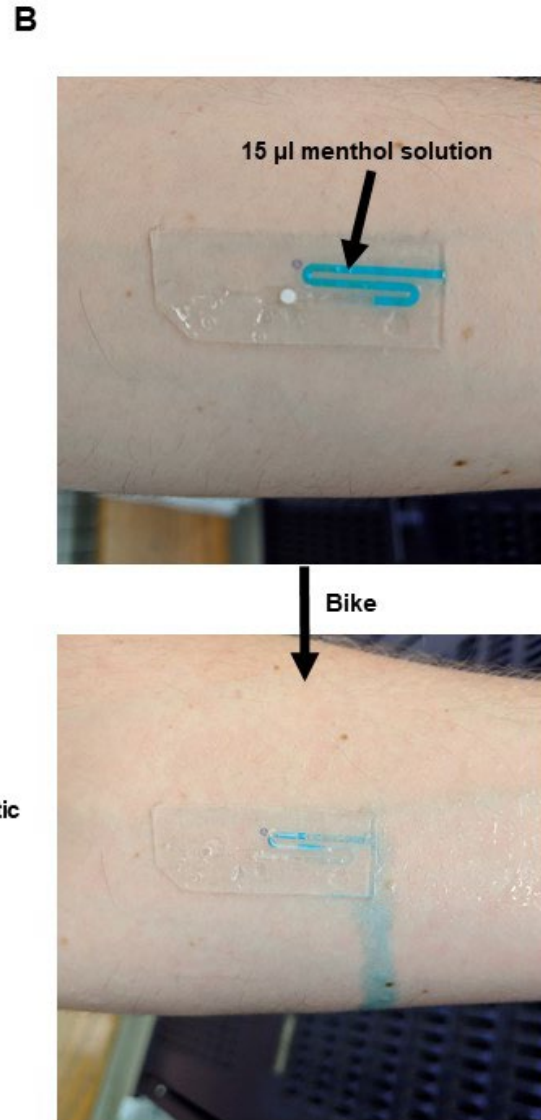

**Supplementary Figure 10. Chemesthetic trials.** A) Epifluidic test structures for on-body chemesthetic tests. Scale bar: 5 mm. B) Representative results for a chemesthetic trial of menthol. Scale bar: 10 mm.

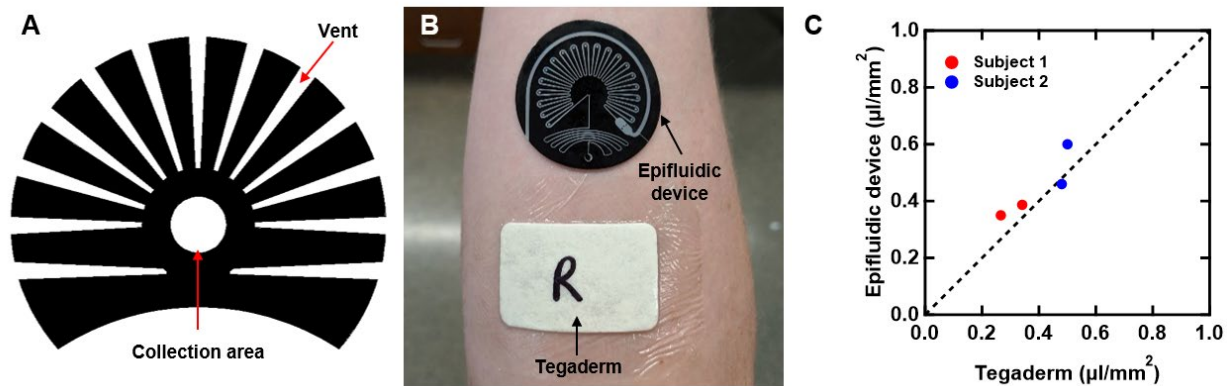

**Supplementary Figure 11. Effect of patterned adhesive and compensatory sweating.** A) Adhesive pattern including radial vents. B) An epifluidic device and Tegaderm absorbent pad mounted on the volar forearm. Scale bar: 2 cm. C) Areal sweat volume for epifluidic devices as compared to Tegaderm absorbent pads for two subjects.
